# Supplementary material
Source: PubMed Central journal article supplement (PMC2194628)
Supplement: mend_me.2007-0290_1.pdf [file mend_me.2007-0290_1.pdf]

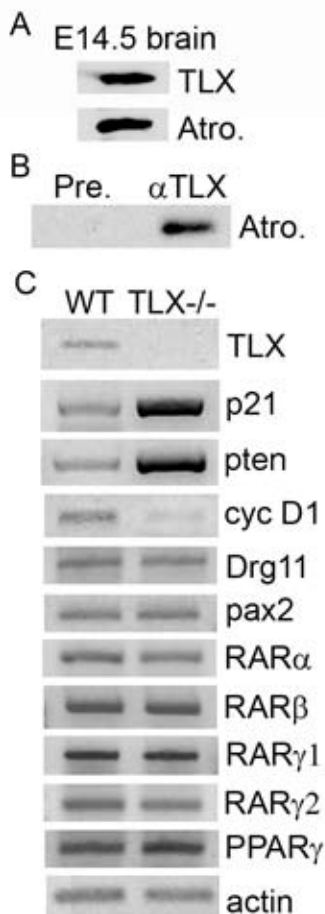

**Supplemental Fig. 1.** TLX interacts with Atrophin in embryonic brains. a. Expression of TLX and Atrophin 1 (Atro.) in embryonic 14.5 day (E14.5) mouse brains by Western blot analysis using TLX and Atrophin 1-specific antibodies. b. TLX interacts with Atrophin 1 in E14.5 mouse brains analyzed by immunoprecipitation analysis. Brain lysates were immunoprecipitated with preimmune serum (Pre.) or TLX-specific antibody ( $\alpha$ TLX). The immunoprecipitates were immunoblotted using Atrophin 1-specific antibody. c. Gene expression in E14.5 wild type (WT) and TLX<sup>-/-</sup> mouse brains analyzed by RT-PCR analysis.
